# Supplementary material for: Impact of aftertreatment devices on primary emissions and secondary organic aerosol formation potential from in-use diesel vehicles: results from smog chamber experiments
Source: Copernicus journal article supplement (doi:10.5194/acp-10-11545-2010), 2010-12-06
Supplement: Supplementary file 1 [file acp-10-11545-2010-supplement.pdf]

## Supplementary material

### **Impact of aftertreatment devices on primary emissions and secondary organic aerosol formation potential from in-use diesel vehicles: Results from smog chamber experiments**

R. Chirico<sup>1,2</sup>, P.F. DeCarlo<sup>1</sup>, M.F. Heringa<sup>1</sup>, T. Tritscher<sup>1</sup>, R. Richter<sup>1</sup>, A.S.H. Prevot<sup>1</sup>, J. Dommen<sup>1</sup>,  
E. Weingartner<sup>1</sup>, G. Wehrle<sup>1</sup>, M. Gysel<sup>1</sup>, M. Laborde<sup>1</sup>, U. Baltensperger<sup>1</sup>

<sup>1</sup>Laboratory of Atmospheric Chemistry, Paul Scherrer Institut, 5232 Villigen PSI, Switzerland

<sup>2</sup>Italian National Agency for New Technologies, Energy and Sustainable Economic Development (ENEA), FIS-LAS, Via E. Fermi 45, 00044 Frascati, Italy

*Correspondence to:* A. S. H. Prevot (andre.prevot@psi.ch)

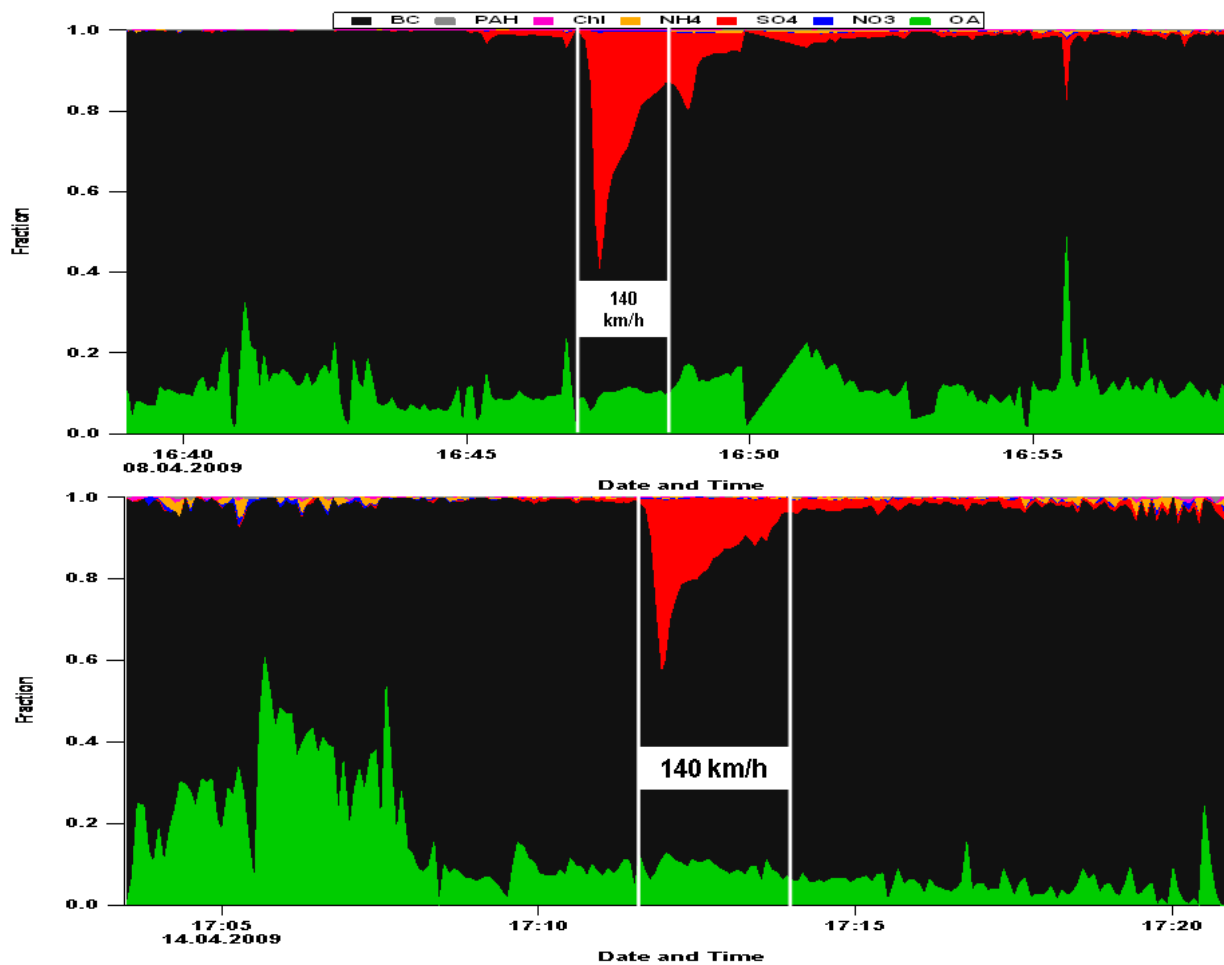

**Figure S.1.** Time series of AMS species and BC as fraction of the total mass (AMS+BC) during two speed ramp tests (idle-50km/h-90km/h-120km/h-140km/h-120km/h-90km/h-50km/h-idle) on a chassis dynamometer (JRC-Ispra) with the Astra. The white bars define the time interval when the speed was increased from 120 km/h to 140km/h and when it was reduced again to 120 km/h.

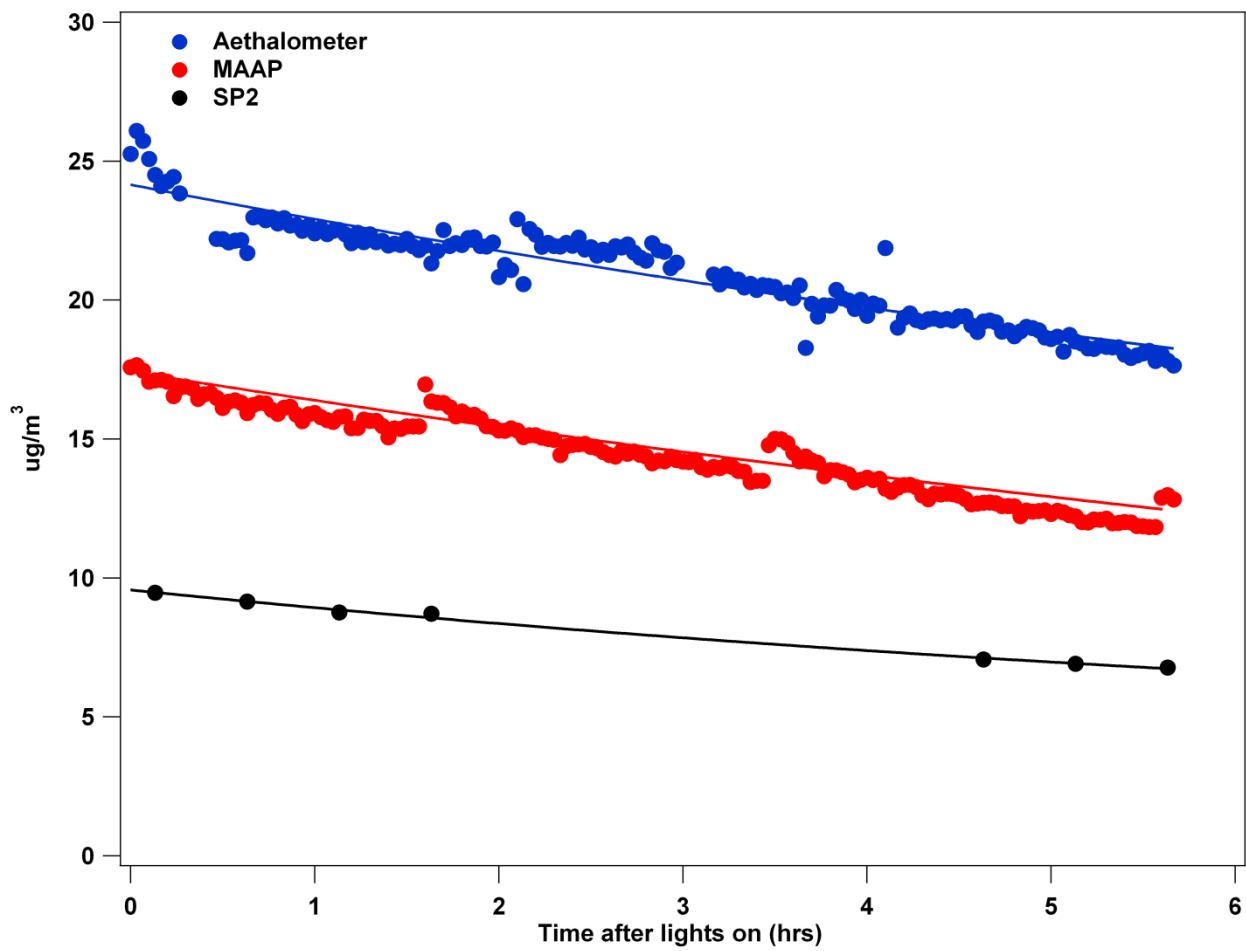

**Figure S.2.** Time series of BC measured by the Aethalometer, the MAAP and the SP2 for one diesel experiment.

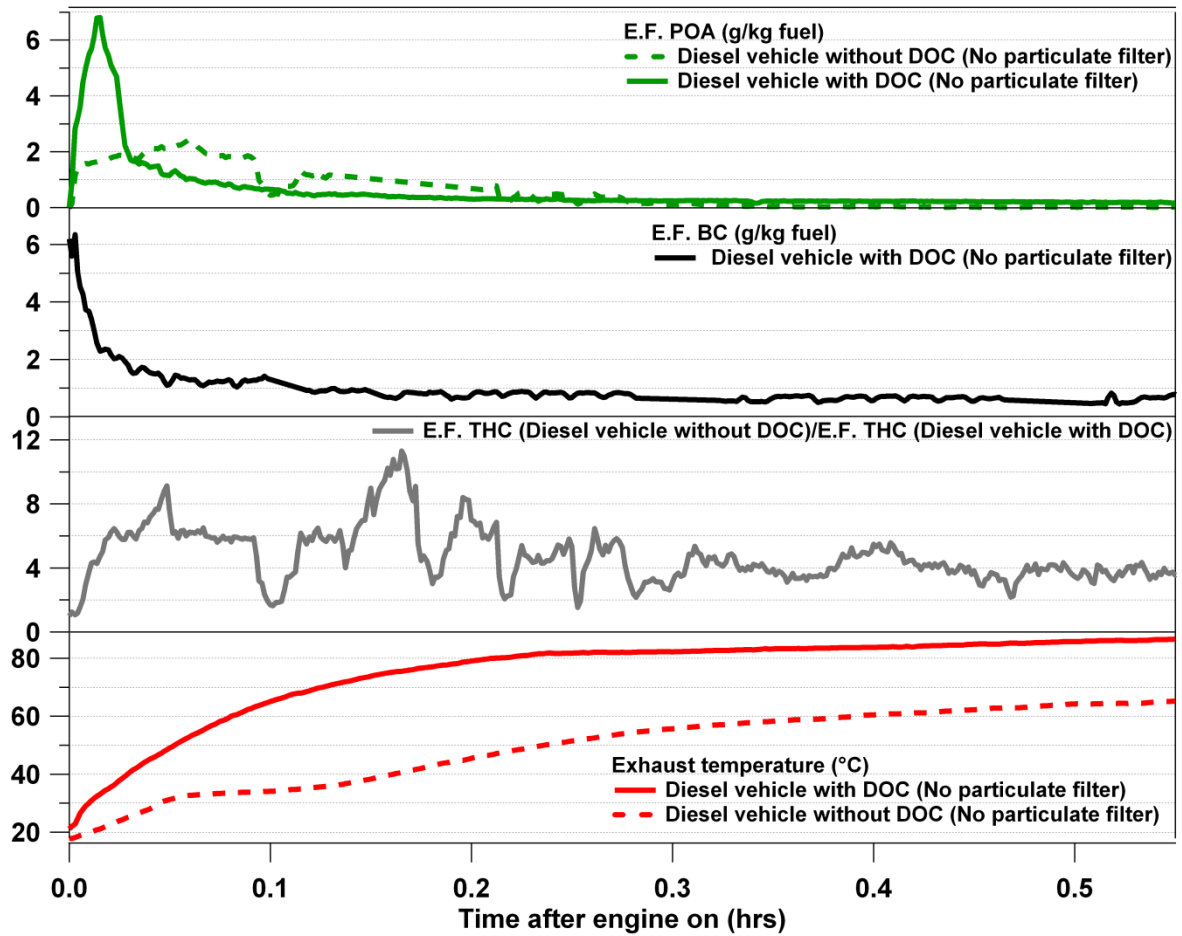

**Figure S.3.** Emission factors for BC, POA (g/kg fuel) and THC emission factor ratio from direct measurement of the exhaust from two diesel vehicles: one with a DOC and another one without aftertreatments. The instruments were connected to the sampling line of Fig. 1 after the dilution stage (~1:7).

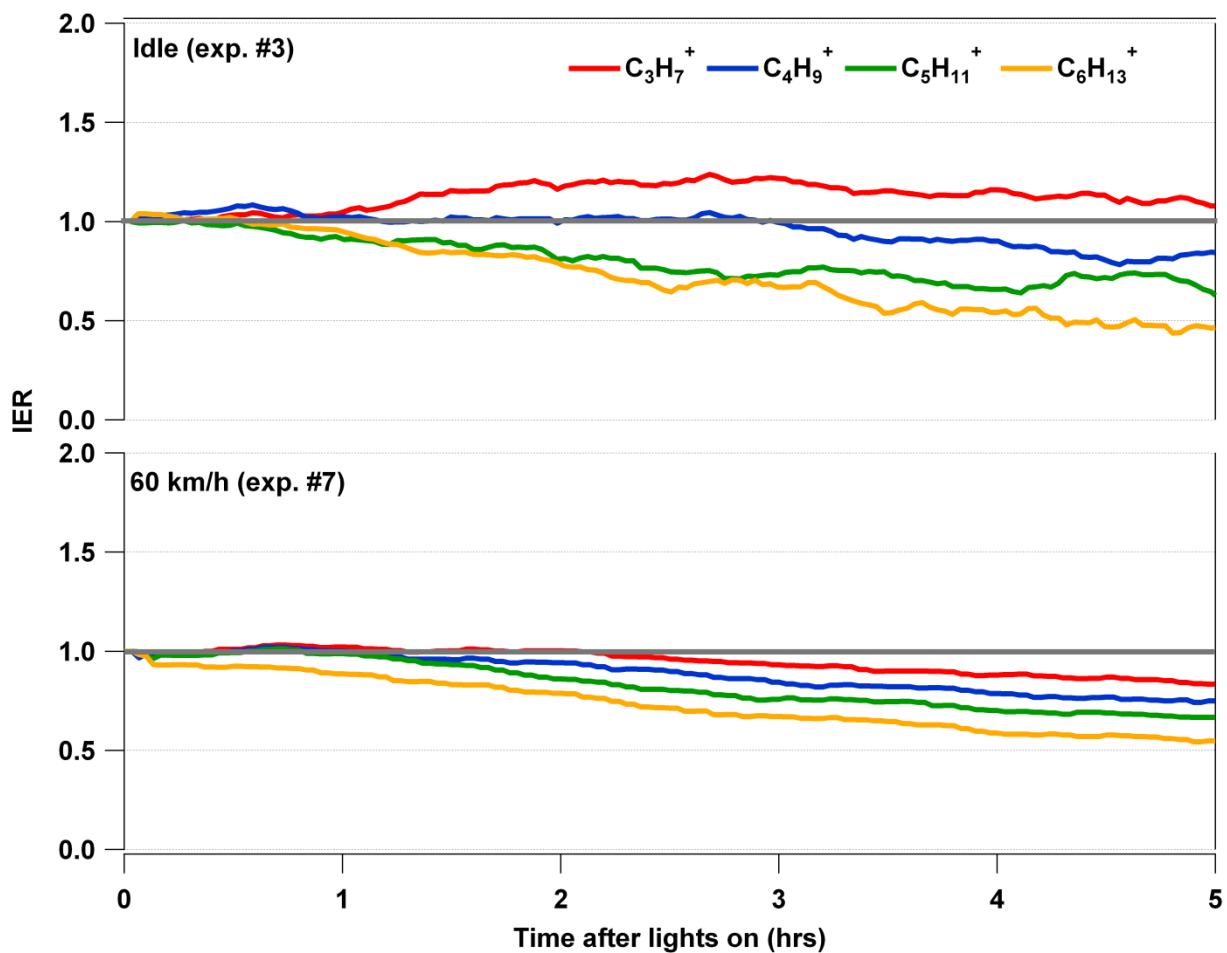

**Figure S.4.** Temporal evolution of the ion enhancement ratios of selected markers of primary organic aerosols for two characteristic experiments with the Astra (idle, deactivated DOC; 60 km/h).

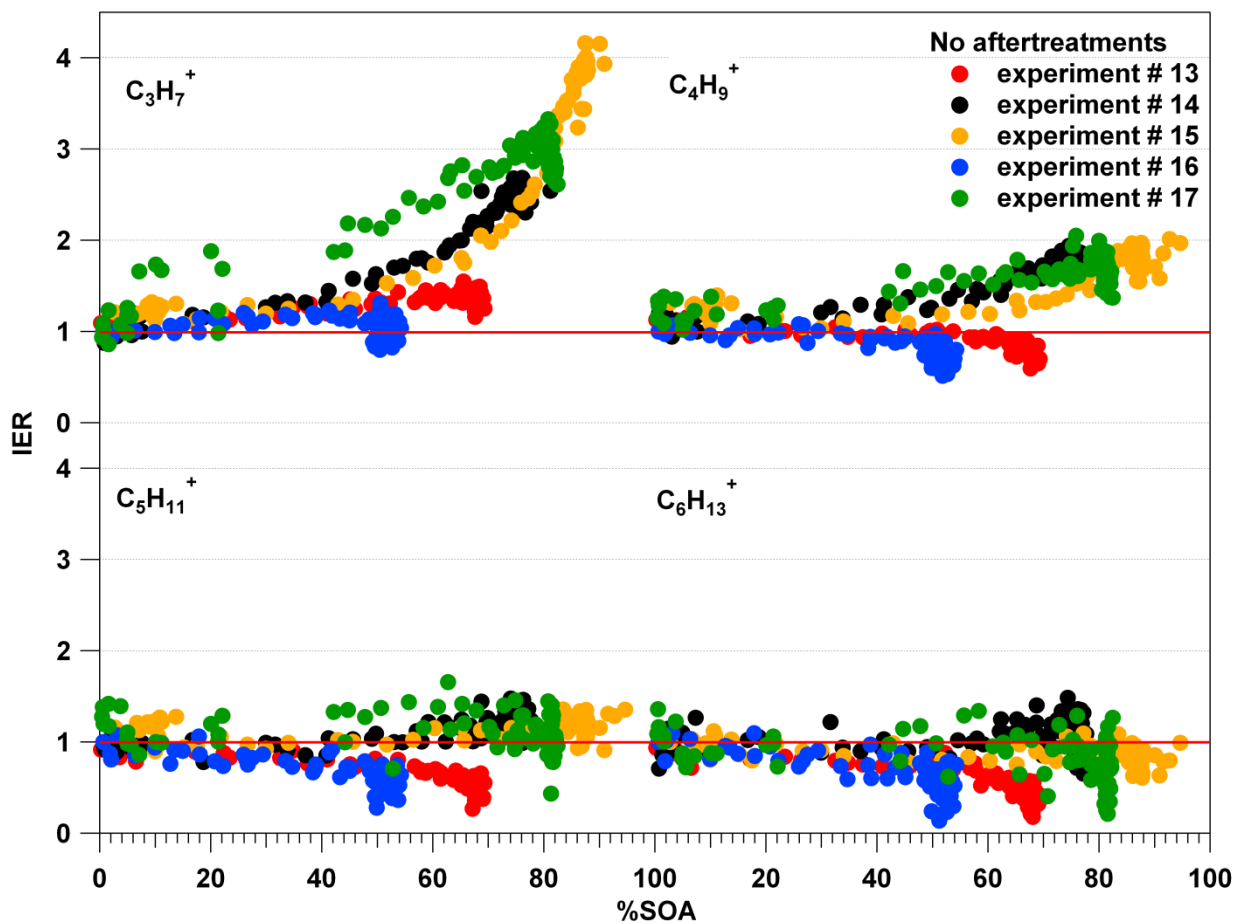

**Figure S.5.** Ion enhancement ratios of selected markers of primary organic aerosol versus the percentage of SOA from experiments with a diesel vehicle lacking aftertreatment devices.

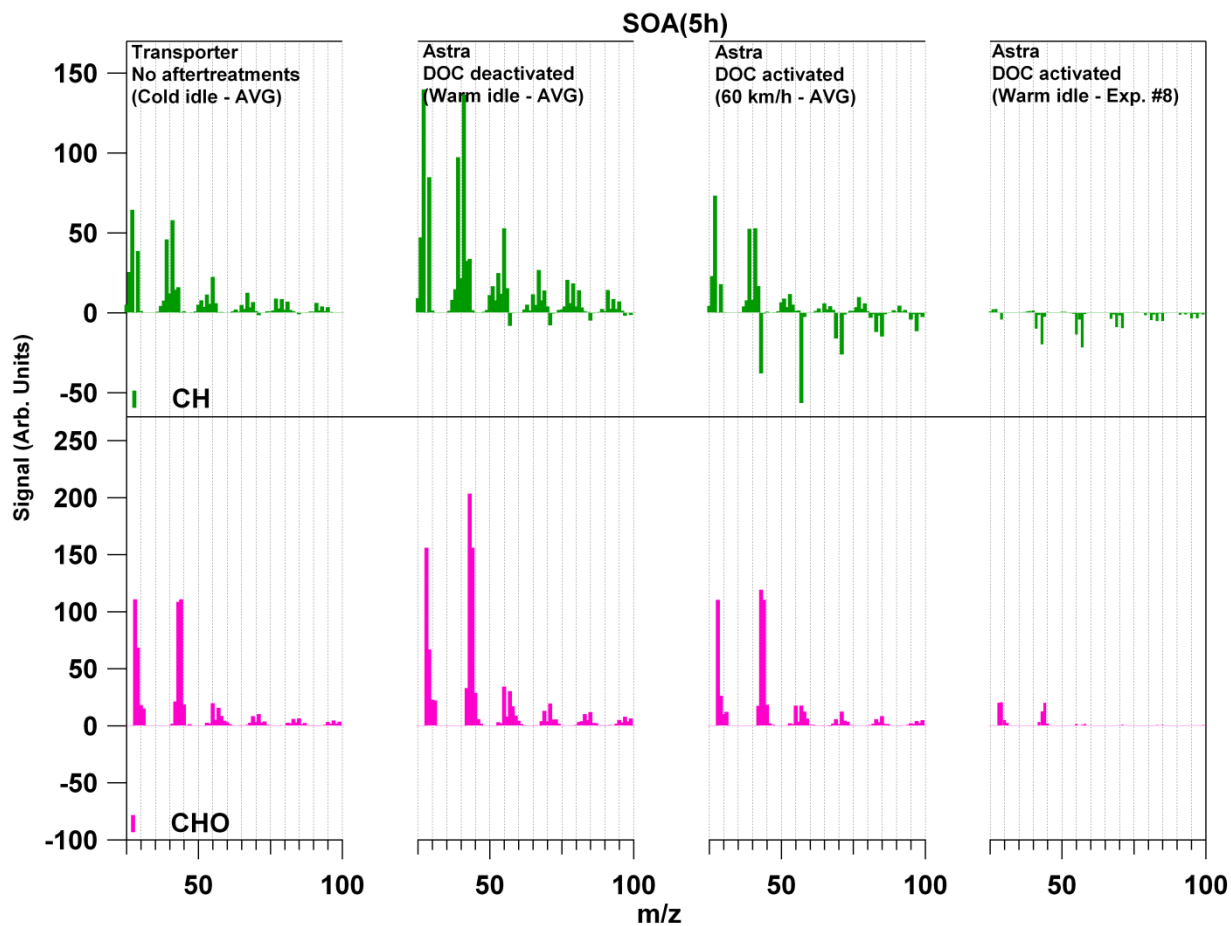

**Figure S.6.** SOA MS in high resolution (CH and CHO family only) after 5 hours of aging (SOA(5h)) obtained with the Equation 7. Each m/z is represented by the average signal intensity.

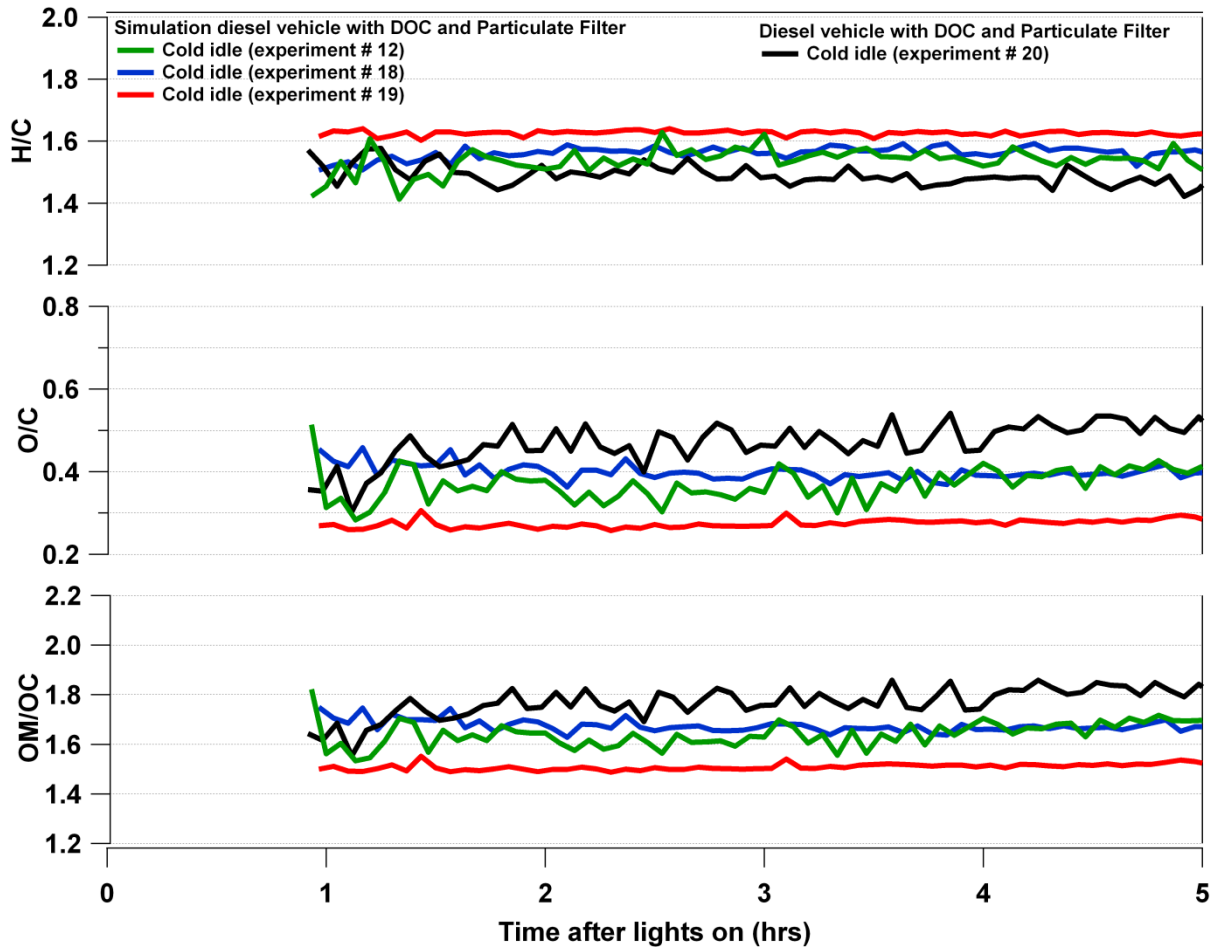

**Figure S.7.** Time series of O/C and H/C atomic ratios and OM/OC ratios from the diesel gas-phase only experiments.
